# Supplementary material
Source: MDPI journal article supplement (https://www.mdpi.com/2073-445X/10/11/1262)
Supplement: s1 [file s1]

# Mining, urban growth and agrarian changes in the Atacama Desert: the case of the Calama oasis in northern Chile

Matías Calderón-Seguel, Manuel Prieto, Oliver Meseguer-Ruiz, Freddy Viñales, Paulina Hidalgo and Elías Esper

**Table S1.** Ethnographic interview guideline (in Spanish).

|                                                                                                                                                                                                                                                                                                                                                                                                                                                                                                                                                                                                                                                                                                                                                                                                                                                                                                                                                                                                                                                                                                                                                                                                                                                                                                                                                                                                                                                                                                                                                                                                                                                                                                                                                                                                                                                                                                                                                                                                                                                                           |
|---------------------------------------------------------------------------------------------------------------------------------------------------------------------------------------------------------------------------------------------------------------------------------------------------------------------------------------------------------------------------------------------------------------------------------------------------------------------------------------------------------------------------------------------------------------------------------------------------------------------------------------------------------------------------------------------------------------------------------------------------------------------------------------------------------------------------------------------------------------------------------------------------------------------------------------------------------------------------------------------------------------------------------------------------------------------------------------------------------------------------------------------------------------------------------------------------------------------------------------------------------------------------------------------------------------------------------------------------------------------------------------------------------------------------------------------------------------------------------------------------------------------------------------------------------------------------------------------------------------------------------------------------------------------------------------------------------------------------------------------------------------------------------------------------------------------------------------------------------------------------------------------------------------------------------------------------------------------------------------------------------------------------------------------------------------------------|
| <p><b>I. Datos del informante</b></p> <p>I.1. Nombre y edad</p> <p>I.2. Rol [Indicar si es dirigente y la organización o si es solo agricultor, ex agricultor...]</p> <p>I.3. Sector donde vive</p>                                                                                                                                                                                                                                                                                                                                                                                                                                                                                                                                                                                                                                                                                                                                                                                                                                                                                                                                                                                                                                                                                                                                                                                                                                                                                                                                                                                                                                                                                                                                                                                                                                                                                                                                                                                                                                                                       |
| <p><b>II. Situando al informante (y su relato)</b></p> <p>II.1. ¿Desde hace cuánto tiempo vive en Calama y en este sector en particular?</p> <p>II. 2. Si es de Calama, ¿sus papás son de acá igual? Si <u>no</u> es de Calama, ¿de dónde viene?</p> <p>II.3. ¿Desde qué época usted ya tiene recuerdos claros del tema que vamos a conversar? (situar una década)</p>                                                                                                                                                                                                                                                                                                                                                                                                                                                                                                                                                                                                                                                                                                                                                                                                                                                                                                                                                                                                                                                                                                                                                                                                                                                                                                                                                                                                                                                                                                                                                                                                                                                                                                    |
| <p><b>III. Producción agrícola y ganadera</b></p> <p>* Para comenzar, vamos a hablar desde los tiempos más antiguos que usted recuerda (precisar aproximadamente década o edad del informante), y cómo eso fue <u>cambiando en el tiempo hasta llegar a la actualidad</u> [→ en cada aspecto siempre dar cuenta de situación pasada, porque/cómo cambió y cómo es actualmente]</p> <p>III. 1 ¿Habían grandes propietarios (fundos o haciendas) o siempre han sido terrenos pequeños?</p> <p>III.2. ¿Si es que habían grandes fundos, me puede contar cómo se fueron acabando? [profundizar todo lo posible en Reforma Agraria en lo que respecta a acciones concretas, grupos involucrados, reacción/participación de la gente, rol del Estado (la CORA), proyectos, políticas, hubo Asentamientos Campesinos, cómo fue la parcelación?]</p> <p>III. 2. ¿Cuáles eran los principales cultivos que habían? ¿Había diferencia entre los tipos de cultivos de los fundos o haciendas con los de los pequeños agricultores?</p> <p>III.3. ¿Cuáles eran (son) los principales animales? ¿Había diferencia en los tipos de animales entre los grandes propietarios y pequeños agricultores?</p> <p>III.4. ¿La gente como accedía a tierra?: eran propietarios, arrendaban, mediería, habían inquilinos, se la prestaban, etc.</p> <p>III.5. ¿Qué tipo de abonos usaban (cordero, otro animal, químico)? ¿De dónde provenía (propio, comprado, etc.)? ¿De dónde provienen o provenían las semillas y cómo se accede a ellas?</p> <p>III.6. ¿Había tractores y otras maquinarias? ¿Qué herramientas se usaban? ¿Las personas que no tenían maquinarias y herramientas cómo lo hacían?</p> <p>III.7. ¿Cómo era la participación de jornaleros, temporeros, asalariados permanentes y el trabajo familiar? [Considerar diferencias fundos o haciendas y pequeños terrenos?]</p> <p>III.8. ¿La gente que trabajaba en la agricultura y animales, era de Calama o de otros lugares de la región / país / extranjero (cuáles)? ¿Hubo algún momento que llegó más gente a trabajar?</p> |

|                                                                                                                                                                                                                                                                                                                                                                                                                                                                                                                                                                                                                                                                                                                                                                                                                                                                                                            |
|------------------------------------------------------------------------------------------------------------------------------------------------------------------------------------------------------------------------------------------------------------------------------------------------------------------------------------------------------------------------------------------------------------------------------------------------------------------------------------------------------------------------------------------------------------------------------------------------------------------------------------------------------------------------------------------------------------------------------------------------------------------------------------------------------------------------------------------------------------------------------------------------------------|
| <p>III. 9. ¿Existía minga o trabajo colectivo para alguna tarea de siembra, cosecha o trilla? ¿Cómo funcionaba?</p>                                                                                                                                                                                                                                                                                                                                                                                                                                                                                                                                                                                                                                                                                                                                                                                        |
| <p><b>IV. Destino de la producción</b> [Si procede, diferenciar entre fundos/haciendas y pequeña agricultura]<br/> [→ en cada aspecto siempre dar cuenta de situación pasada, porque/cómo cambió y cómo es actualmente]<br/> IV.1. ¿Qué pasa con la producción agrícola (diferenciar cultivo por ejemplo alfalfa, choclo y otros)?<br/> - Autoconsumo, venta, se intercambia.<br/> IV.2. De la producción autoconsumo ¿Es una parte mayoritaria, intermedia o menor la que queda para el gasto de la casa?<br/> IV.3. De la producción que se vendía o vende: ¿se hace directo o con intermediario? ¿en el predio o se traslada? ¿si se traslada quién lo hace? ¿en que lugares se vende (feria modelo, feria rotativa, otros).<br/> IV.4. De la producción que se intercambiaba o intercambia: ¿es a familiares, amigos, compadres, etc.? ¿con gente de Calama o de otros pueblos? ¿Cómo se traslada?</p> |
| <p><b>V. Riego</b><br/> [→ en cada aspecto siempre dar cuenta de situación pasada, porque/cómo cambió y cómo es actualmente]<br/> V.1. ¿Recuerda cuándo y cómo se revistieron los canales?<br/> V.2. ¿Está regularizada las acciones de agua, cuándo y cómo fue eso?<br/> V.3. ¿Cómo se organizaba y organiza el riego? ¿Hay turnos, celador, o es por llegada, etc.? ¿Se paga?<br/> V.4. ¿Cómo funcionan las organizaciones de canalistas?<br/> V.5. ¿Cómo lo hace la gente que no tiene agua?<br/> V.6. ¿Han existido compras y ventas de aguas entre agricultores o hacia empresas mineras u otras?<br/> V.7. ¿Cuáles son los principales problemas en torno al riego y acceso al agua?</p>                                                                                                                                                                                                             |
| <p><b>VI. Rol del Estado en el fomento agrario</b><br/> [→ en cada aspecto siempre dar cuenta de situación pasada, porque/cómo cambió y cómo es actualmente]<br/> VI.1. ¿Cuál es su opinión del papel pasado y actual de los proyectos estatales en la actividad agropecuaria? Por ejemplo INDAP, Comisión de Riego, DOH, SAG o CONADI.<br/> VI.2. ¿Qué proyectos recuerda que hayan sido beneficiosos y otros que no hayan resultado?<br/> VI. 3. ¿Qué le parece el uso de invernaderos, riego goteo y revestimiento de canales?</p>                                                                                                                                                                                                                                                                                                                                                                      |
| <p><b>VII. Otros</b><br/> VII.1. ¿Cómo ve usted el tema de la agricultura en relación a la minería y crecimiento de la ciudad?<br/> VII.2. ¿Existían y/o existen asociaciones u organizaciones de productores agropecuarios, comerciantes agropecuarios, cooperativas? ¿Cómo funcionan o funcionaron? ¿Qué pasó con su existencia?<br/> VII.3. ¿Con la presencia de comunidades o asociaciones indígenas ha cambiado en algo el tema agrario por proyectos, tierras o aguas? [Ley Indígena de 1993].<br/> VII.4. ¿Le tocó ver como cuando se usaba yareta en la ciudad? [profundizar en usos, de dónde venía, quién la traía y cómo, puntos de venta en la ciudad, etc.].</p>                                                                                                                                                                                                                              |
